# Supplementary material for: A two component thermoreversible hydrogel of riboflavin and melamine: Enhancement of photoluminescence in the gel form
Source: Royal Society of Chemistry journal article supplement (doi:10.1039/b608234c), 2006-01-01
Supplement: b608234c.pdf [file b608234c.pdf]

# Supplementary Material (ESI) for Chemical Communications  
# This journal is (c) The Royal Society of Chemistry 2006

**Supplementary Materials of the Manuscript:**

**A two Component Thermoreversible Hydrogel of Riboflavin and Melamine:**

**Enhancement of Photoluminescence in the Gel form**

# Supplementary Material (ESI) for Chemical Communications  
# This journal is (c) The Royal Society of Chemistry 2006

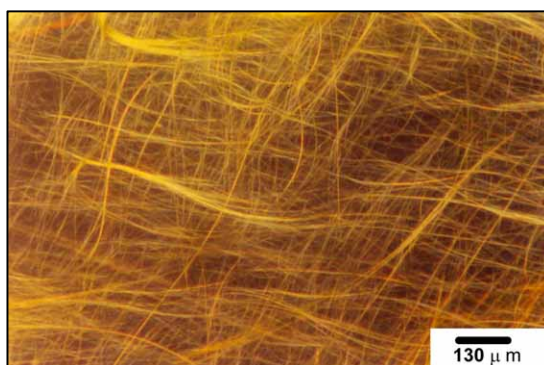

**Supplementary Figure S1:** Optical micrograph of riboflavin – melamine (3 :1 mole ratio) hydrogel (0.5 %w/v) under crossed polariser.

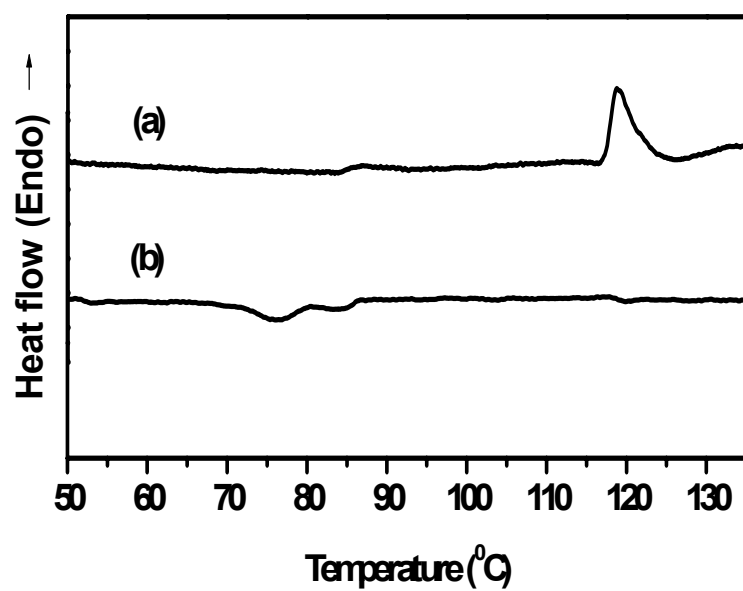

**Supplementary Figure S2:** DSC thermograms of riboflavin – melamine (3 :1 mole ratio) hydrogel for 0.5%(w/v) (a) Heating at 10<sup>0</sup>/min (b) Cooling at 5<sup>0</sup>/ min.

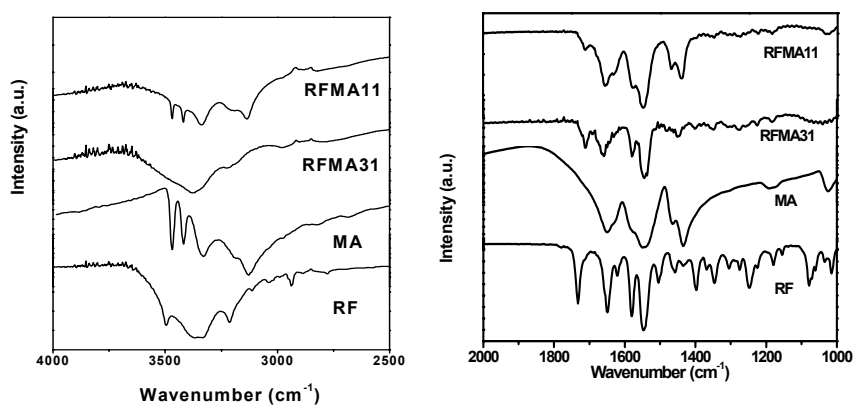

**Supplementary Figure S3:** FTIR spectra of R-M complexes (1:1 and 1:3 molar ratio) and pure components.

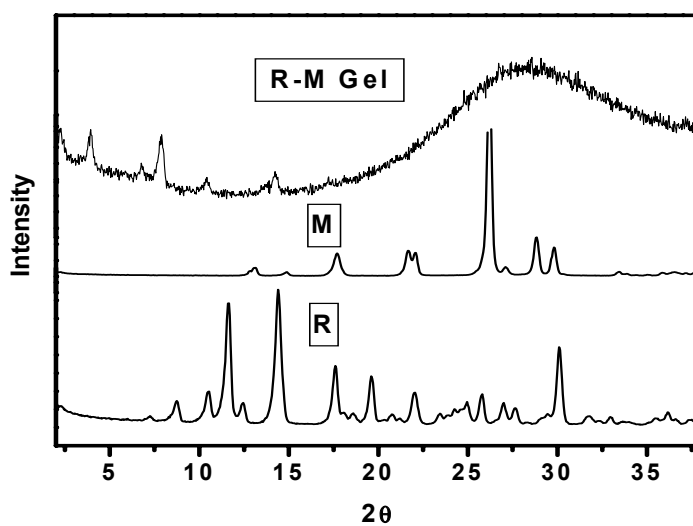

**Supplementary Figure S4:** Comparison of WAXS patterns of riboflavin (R), melamine (M) and riboflavin -melamine (R-M)( 3:1 mole ratio) hydrogel (0.5% w/v).
